# Supplementary material for: TRPM4 Blocking Antibody Protects Cerebral Vasculature in Delayed Stroke Reperfusion
Source: MDPI journal article supplement (doi:10.3390/biomedicines11051480), 2023-05-19
Supplement: s1 [file s1]

**Table S1.** Summary of vascular areas (Figure 1B)

| Summary of vascular areas |                       |                                    |                                      |
|---------------------------|-----------------------|------------------------------------|--------------------------------------|
| N (Images)                | Hours after occlusion | Vascular areas ( $\mu\text{m}^2$ ) | <i>p</i> -Value                      |
| 9                         | 3                     | 321.04 $\pm$ 43.98                 | <0.0001 3hr vs. 6hr, 9hr, 12hr, 24hr |
| 6                         | 6                     | 199.33 $\pm$ 25.07                 | < 0.001 6hr vs. 9hr, 12hr, 24hr      |
| 6                         | 9                     | 89.54 $\pm$ 14.00                  |                                      |
| 8                         | 12                    | 87.86 $\pm$ 12.13                  |                                      |
| 8                         | 24                    | 86.80 $\pm$ 8.78                   |                                      |

Data are presented as mean  $\pm$  S.E.M

**Table S2.** TRPM4 current density in control (Figure 2B) and ATP depletion (Figure 2D) condition

| TRPM4 current density |                         |                         |               |                         |                        |
|-----------------------|-------------------------|-------------------------|---------------|-------------------------|------------------------|
| IgG treatment         |                         |                         | M4P treatment |                         |                        |
| N                     | Current density (pA/pF) | Membrane potential (mV) | N             | Current density (pA/pF) | <i>p</i> -Value vs IgG |
| 15                    | -94.76 $\pm$ 21.44      | -100 Control            | 12            | -44.32 $\pm$ 10.17      | 0.041                  |
| 15                    | 155.47 $\pm$ 29.59      | +100 Control            | 12            | 58.05 $\pm$ 8.51        | 0.004                  |
| 12                    | -230.52 $\pm$ 61.01     | -100 ATP depletion      | 9             | -64.58 $\pm$ 28.10      | 0.039                  |
| 12                    | 266.28 $\pm$ 40.69      | +100 ATP depletion      | 9             | 107.17 $\pm$ 29.62      | 0.008                  |

Data are presented as mean  $\pm$  S.E.M

**Table S3.** Summary of infarct area 24 hrs after operation (Figure 3D)

| Summary of infarct area |           |                  |                              |
|-------------------------|-----------|------------------|------------------------------|
| N (Rat brains)          | Treatment | Infarct area (%) | <i>p</i> -Value              |
| 8                       | M4P       | 11.80 $\pm$ 2.05 | <0.01 M4P vs. Vehicle, pMCAO |
| 8                       | IgG       | 14.13 $\pm$ 1.52 |                              |
| 8                       | Vehicle   | 20.20 $\pm$ 1.27 |                              |
| 7                       | pMCAO     | 22.15 $\pm$ 1.97 |                              |

Data are presented as mean  $\pm$  S.E.M

**Table S4.** Summary of the vascular diameter (Figure 4B)

| Summary of the vascular diameter |           |                                     |                 |
|----------------------------------|-----------|-------------------------------------|-----------------|
| N (Images)                       | Treatment | Vascular diameter ( $\mu\text{m}$ ) | <i>p</i> -Value |
| 14                               | pMCAO     | 5.02 $\pm$ 0.19                     | <0.0001 vs. IgG |
| 14                               | IgG       | 6.13 $\pm$ 0.14                     | <0.05 vs. M4P   |
| 14                               | M4P       | 6.67 $\pm$ 0.10                     |                 |

Data are presented as mean  $\pm$  S.E.M

**Table S5.** Summary of Evens blue quantification (Figure 4D)

| Summary of Evens blue quantification |                          |                  |               |                          |                |
|--------------------------------------|--------------------------|------------------|---------------|--------------------------|----------------|
| IgG treatment                        |                          |                  | M4P treatment |                          |                |
| N (Rat)                              | Evens blue (µg/g tissue) | Brain hemisphere | N (Rat)       | Evens blue (µg/g tissue) | p-Value vs IgG |
| 8                                    | 3.89 ± 0.66              | Ipsi             | 10            | 2.40 ± 0.29              | <0.05          |
| 8                                    | 1.25 ± 0.14              | Contra           | 10            | 1.27 ± 0.14              |                |

Data are presented as mean ± S.E.M

**Table S6.** Summary of cerebral blood flow (Figure 5C)

| Summary of cerebral blood flow of 7 hr reperfusion |                        |             |               |                        |                |
|----------------------------------------------------|------------------------|-------------|---------------|------------------------|----------------|
| IgG treatment                                      |                        |             | M4P treatment |                        |                |
| N (Rat)                                            | Percentage of Baseline | Treatment   | N (Rat)       | Percentage of Baseline | p-Value vs IgG |
| 6                                                  | 24.22 ± 2.95           | Occlusion   | 9             | 25.85 ± 2.13           | <0.01          |
| 6                                                  | 30.25 ± 5.25           | Reperfusion | 9             | 43.03 ± 3.83           |                |

Data are presented as mean ± S.E.M

**Table S7.** Summary of cerebral blood flow (Figure 5D)

| Summary of cerebral blood flow of 3 hr reperfusion |                        |             |               |                        |                |
|----------------------------------------------------|------------------------|-------------|---------------|------------------------|----------------|
| IgG treatment                                      |                        |             | M4P treatment |                        |                |
| N (Rat)                                            | Percentage of Baseline | Treatment   | N (Rat)       | Percentage of Baseline | p-Value vs IgG |
| 10                                                 | 31.22 ± 2.08           | Occlusion   | 6             | 30.81 ± 2.74           | <0.01          |
| 10                                                 | 64.26 ± 6.98           | Reperfusion | 6             | 89.44 ± 8.22           |                |

Data are presented as mean ± S.E.M

**Table S8.** Assessment of motor functions by Rotarod test (Figure 5E)

| Rotarod test |                |           |                        |                                      |
|--------------|----------------|-----------|------------------------|--------------------------------------|
| N (Rat)      | Day after MCAO | Treatment | Percentage of Baseline | p-Value                              |
| 7            | 1              | Sham      | 86.27 ± 6.20           | <0.001 vs. M4P, pMCAO, IgG for day 1 |
| 7            | 1              | M4P       | 18.28 ± 7.35           |                                      |
| 7            | 1              | pMCAO     | 25.21 ± 4.28           |                                      |
| 7            | 1              | IgG       | 10.96 ± 4.70           |                                      |
| 7            | 3              | Sham      | 90.78 ± 4.87           | <0.001 vs. M4P, pMCAO, IgG for day 3 |
| 7            | 3              | M4P       | 52.86 ± 3.86           |                                      |
| 7            | 3              | pMCAO     | 46.02 ± 5.90           |                                      |
| 7            | 3              | IgG       | 30.67 ± 7.30           |                                      |
| 7            | 5              | Sham      | 93.28 ± 3.94           |                                      |
| 7            | 5              | M4P       | 84.09 ± 2.42           |                                      |

|   |   |       |              |
|---|---|-------|--------------|
| 7 | 5 | pMCAO | 59.29 ± 7.51 |
| 7 | 5 | IgG   | 72.00 ± 7.32 |
| 7 | 7 | Sham  | 95.89 ± 5.07 |
| 7 | 7 | M4P   | 86.23 ± 3.65 |
| 7 | 7 | pMCAO | 75.01 ± 4.48 |
| 7 | 7 | IgG   | 82.31 ± 3.09 |

Data are presented as mean ± S.E.M
